# Supplementary material for: Whole-Genome Sequencing Insights into Porin-Mediated Resistance and Spread of ESBL- Producing Klebsiella pneumoniae in a Ghanaian Teaching Hospital
Source: Research Square preprint supplement (doi:10.21203/rs.3.rs-5671518/v1), 2025-04-17
Supplement: Supplementary file 1 [file 87b967a6d4c088200920b051.docx]

**Whole-Genome Sequencing and Bioinformatics Analysis of ESBL-Producing *Klebsiella pneumoniae* in a Ghanaian Teaching Hospital**

**Table S1: Genome and assembly characteristics of sequenced *K. pneumoniae* isolates from patients and the hospital environment**

| **Isolate ID** | **Source** | **Accession No.** | **Sequence Length** | **No. Of Contigs** | **GC Content %** | **Longest contig size (bp)** | **N50 value** | **L50 value** |
| --- | --- | --- | --- | --- | --- | --- | --- | --- |
| P60-1 | Patient | SAMN27356690 | 5369680 | 85 | 57.4 | 315240 | 156243 | 12 |
| P121 | Patient | SAMN27356691 | 5385468 | 119 | 57.4 | 359829 | 152182 | 13 |
| P136 | Patient | SAMN27356692 | 5567722 | 120 | 57.1 | 431941 | 146906 | 13 |
| P144 | Patient | SAMN27356693 | 5666331 | 98 | 56.7 | 529950 | 205953 | 9 |
| P129 | Patient | SAMN27356700 | 5351798 | 96 | 57.4 | 548197 | 156054 | 10 |
| E50-2 | Dripstand | SAMN27356699 | 5539526 | 95 | 57.2 | 389286 | 192424 | 11 |
| E4 | Bed | SAMN27356686 | 5548621 | 95 | 57.2 | 453525 | 185184 | 11 |
| E34A | Dripstand | SAMN27356687 | 5643793 | 89 | 57.1 | 496865 | 179681 | 11 |
| E35 | Door | SAMN27356688 | 5405239 | 111 | 57.5 | 305829 | 138484 | 13 |
| E55-1 | Tap | SAMN27356702 | 5373911 | 72 | 57.3 | 535663 | 238341 | 9 |

**Table S2: Minimum inhibitory concentrations of antibiotics against ESBL *K. pneumoniae* isolates**

| **ID** | **Site** | **Penicillin** | Cephalosporins | | | | **β-lactamase inhibitors** | | **Carbapenems** | | | | **Aminoglycosides** | | | **FQ** | **Others** | |
| --- | --- | --- | --- | --- | --- | --- | --- | --- | --- | --- | --- | --- | --- | --- | --- | --- | --- | --- |
| **AMP** | CXM | CAZ | CRO | FEP | **AMC** | **TZP** | **DOR** | **ERT** | **IMI** | **MER** | **GEN** | **TOB** | **AMK** | **CIP** | **COT** | **TIG** |
| P129 | Hand | >=32 | >=64 | >=32 | >=64 | 32 | 16 | >=128 | <=1 | <=0.5 | <=0.25 | <=0.25 | >=16 | >=16 | <=2 | >=4 | >=320 | 1 |
| E34A | Dripstand | >=32 | >=64 | >=64 | >=64 | >=64 | >=32 | >=128 | <=1 | <=0.5 | <=0.25 | <=0.25 | >=16 | >=16 | <=2 | >=4 | >=320 | 2 |
| E4 | Bed | >=32 | >=64 | >=32 | >=64 | >=16 | >=32 | >=128 | <=1 | <=0.5 | 1 | <=0.25 | >=16 | >=16 | <=2 | >=4 | >=320 | <=0.5 |
| E50-2 | Dripstand | >=32 | >=64 | >=32 | >=64 | 32 | 16 | >=128 | <=1 | <=0.5 | <=0.25 | <=0.25 | >=16 | >=16 | <=2 | >=4 | >=320 | <=0.5 |
| P121 | Rectal | >=32 | >=64 | >=64 | >=64 | 32 | >=32 | >=128 | 2 | <=0.5 | <=0.25 | 2 | >=16 | >=16 | <=2 | >=4 | >=320 | <=0.5 |
| P136 | Rectal | >=32 | >=64 | >=32 | >=64 | 32 | >=32 | >=128 | <=1 | <=0.5 | <=0.25 | <=0.25 | >=16 | >=16 | S | <=0.25 | >=320 | 1 |
| P60-1 | Rectal | >=32 | >=64 | >=64 | >=64 | >=16 | >=32 | >=128 | 2 | <=0.5 | <=0.25 | 2 | <=1 | <=1 | <=2 | 0.5 | >=320 | 1 |
| E35 | Door handle | >=32 | >=64 | >=32 | >=64 | >=16 | >=32 | >=128 | <=1 | <=0.5 | <=0.25 | <=0.25 | <=1 | <=1 | <=2 | <=0.25 | >=320 | <=0.5 |
| P144 | Rectal | >=32 | >=64 | >=32 | >=64 | 2 | 16 | 16 | <=1 | <=0.5 | <=0.25 | <=0.25 | <=1 | >=16 | 4 | >=4 | >=320 | 1 |
| E55-1 | Tap | >=32 | 16 | >=32 | <=1 | >=16 | >=32 | >=128 | 2 | <=0.5 | <=0.25 | 4 | <=1 | <=1 | <=2 | <=0.25 | <=20 | <=0.5 |

The MIC profile is represented as an isolate being resistant (orange) or of intermediate resistance (gold) or susceptible (white) to the antibiotic indicated on the bottom column header (and the drug class it belongs to on the top column header). FQ-fluoroquinolone, O&G-Obstetrics and Gynaecology

AMK:Amikacin, CXM:Cefuroxime, DOR:Doripenem, FEP:Cefepime, CRO:Ceftriaxone, CAZ:Ceftazidime, CIP:Ciprofloxacin, AMC:Amoxicillin/clavulanic acid, SXT:Trimethoprim/Sulphamethoxazole, ERT:Ertapenem, GEN:Gentamicin, IPM:Imipenem, MEM:Meropenem, TZP:Piperacillin/Tazobactam, TOB:Tobramycin, TGC:Tigecycline

**Table S3: Mobile genetic elements associated with antibiotic resistance**

| **ID** | **Contig** | **Synteny of resistant genes** | **Plasmid/chromosomal sequence with closest nucleotide homology (accession number)** |
| --- | --- | --- | --- |
| E4 | 58 | CTX-M-15:IS1380(transposase)::recombinase:TEM-1:IS91transposase):APH(6)-Id:aph(3'')-Ib:sul2: | *K. pneumoniae* isolate 307 genome, plasmid: P2 (OX030720.1) |
| 60 | QnrB1::Tn3(transposase):transposase::recombinase:transposase | *K. pneumoniae* strain E17KP0053 plasmid pE17KP0053-2 (CP052219.1) |
| 70 | IS3(transposase)::aac(3)-IIe: | *K. pneumoniae* strain EFN 299 plasmid p4 (CP092593.1) |
| 71 | CatB3:oxa-1:AC(6')-Ib-cr5 | *K. pneumoniae* strain KPH3 plasmid p1 (CP102553.1) |
| E34A | 56 | recombinase:TEM-1:IS91(transposase):APH(6)-Id:aph(3'')-Ib:sul2: | *K. pneumoniae* strain 1159 plasmid pMB5730_1(CP103655.1) |
| 65 | IS3(transposase)::aac(3)-IIe: | *K. pneumoniae* strain 197 plasmid pMB2966_1 (CP103730.1) |
| 67 | catB3:oxa-1:AAC(6')-Ib-cr5 | *K. pneumoniae* strain KPH3 plasmid p1(CP102553.1) |
| 64 | IS1380(transposase):CTX-M-15 | *K. pneumoniae* strain 2021CK-01815 plasmid unnamed1 (CP104374.1) |
| 54 | QnrB1::Tn3(transposase):transposase:recombinase | *K. pneumoniae* strain 197 plasmid pMB2966_1 (CP103730.1) |
| 55 | DfrA14:IntI1(integrase): | *K. pneumoniae* strain 197 plasmid pMB2966_1 (CP103730.1) |
| 58 | tet(A):tetR(A):relaxase:Tn3(transposase): | *K. pneumoniae* isolate 392 genome, plasmid: P2 (OX030689.1) |
| E35 | 66 | sul1:QacE:DfrA15:intI1(integrase): | *K. pneumoniae* strain Nord5-1_R48 plasmid pR48_2 (CP091591.1) |
| 72 | catA1::Tn3(transposase) | *K. pneumoniae* strain 39427 plasmid pKPN39427.1 (CP054265.1) |
| P60-1 | 58 | APH(6)-Id:APH(3'')-Ib:sul2: | *K. pneumoniae* CC37 plasmid pCC37 (LC556212.1) |
| 34 | tetR(A):tet(A)::EamA::Tn3(transposase):IS3(transposase): | *K. pneumoniae* strain FDAARGOS_447 plasmid unnamed3 (CP023950.1) |
| 68 | transposase:TEM-1:recombinase | *K. pneumoniae* strain F17KP0040 plasmid pF17KP0040-1 (CP052139.1) |
| P121 | 49 | IS3(transposase)::aac(3)-IIe:TEM-1:recombinase::IS1380(transposase):CTX-M-15::Tn3(transposase):QnrS1:recombinase:ISKra4(transposase):recombinase: | *K. pneumoniae* strain F16KP0096 plasmid pF16KP0096-1 (CP052151.1) |
| 64 | IS6(transposase):::sul1:QacE:aadA1:dfrA15:intI1(integrase):recombinase:Tn3(transposase): | *K. pneumoniae* isolate BB1465 genome, plasmid:pKP-CTX-M-15_( LR822059.1) |
| 66 | blaSCO-1:recombinase | Klebsiella sp. PO552 plasmid p1 (CP037442.1) |
| 73 | sul2:IS91(transposase):::recombinase | *K. pneumoniae* strain Kpn223 plasmid pKPN-065 ( CP015026.1) |
| 81 | Tn3(transposase):APH(6)-Id: aph(3'')-Ib | *K. pneumoniae* strain E16KP0102 plasmid pE16KP0102-2 (CP052311.1) |
| P136 | 77 | Tn3(transposase):APH(6)-Id:aph(3'')-Ib | *K. pneumoniae* strain CriePir26 plasmid unnamed1 (CP062987.1) |
| 63 | blaSCO-1:recombinase | *K. pneumoniae* strain E17KP0027 plasmid pE17KP0027-1 (CP052240.1) |
| 88 | catB3:oxa-1:AAC(6')-Ib-cr5:IS6(transposase) | Escherichia coli O25b:H4-ST131 strain U1 plasmid pU1 (MK295825.1) |
| 73 | sul2::IS91(transposase)::recombinase | *K. pneumoniae* strain Kpn223 plasmid pKPN-065 (CP015026.1) |
| 62 | Tn3(transposase):IS6(transposase)::sul1:QacE:aadA1:dfrA15:intI1(integrase:recombinase:Tn3(transposase) | *K. pneumoniae* strain 913 plasmid pMB2930_1 (CP103732.1) |
| E50-2 | 78 | catB3:oxa-1: AAC(6')-Ib-cr5 | *K. pneumoniae* strain KPH3 plasmid p1 (CP102553.1) |
| 57 | CTX-M-15::IS1380(transposase)::recombinase:TEM-1:IS91(transposase):APH(6)-Id:APH(3'')-Ib:sul2:IS110(transposase) | *K. pneumoniae* strain 197 plasmid pMB2966_1 (CP103730.1) |
| 62 | QnrB1::Tn3)transposase):recombinase:Tn3(transposase) | *K. pneumoniae* strain E17KP0053 plasmid pE17KP0053-2 (CP052219.1) |
| 75 | IS3(transposase)::aac(3)-Iie: | *K. pneumoniae* strain KPH3 plasmid p1 (CP102553.1) |
| 64 | IS6(transposase):mobC(relaxome):dfrA14:IntI1(integrase) | *K. pneumoniae* strain 197 plasmid pMB2966_1(CP103730.1) |
| P129 | 55 | AadA1:dfrA15:intI1(integrase):recombinase:Tn3(transposase):IS110(transposase): | *K. pneumoniae* strain CriePir26 plasmid unnamed1(CP062987.1) |
| 70 | IS3(transposase)::aac(3)-Iie: | *K. pneumoniae* strain KPH3 plasmid p1(CP102553.1) |
| 71 | catB3:oxa-1:AAC(6')-Ib-cr5 | *K. pneumoniae* strain KPH3 plasmid p1(CP102553.1) |

**Table S4:** **Chromosomal point mutations of MDR *K. pneumoniae* isolates**

| **ISOLATE ID** | **SOURCE** | ***gyrA*** | ***gyrB*** | ***parC*** | ***parE*** | ***acrR*** |
| --- | --- | --- | --- | --- | --- | --- |
| P129 | Patient | S83Y, D87A | None | S80I | None | P161R, G164A, F172S, R173G, F204L |
| P60-1 | Patient | None | None | None | None | P161R, G164A, F172S, R173G, L195V, F197I, K201M |
| P121 | Patient | None | None | None | None | P161R, G164A, F172S, R173G, L195V, F197I, K201M |
| P136 | Patient | None | None | None | None | P161R, G164A, F172S, R173G, L195V, F197I, K201M |
| P144 | Patient | None | None | None | None | P161R, G164A, F172S, R173G, L195V, F197I, K201M |
| E50-2 | Environment | None | None | None | None | P161R, G164A, F172S, R173G, L195V, F197I, K201M |
| E55-1 | Environment | None | None | None | None | P161R, G164A, F172S, R173G, L195V, F197I, K201M |
| E4 | Environment | None | None | None | None | P161R, G164A, F172S, R173G, L195V, F197I, K201M |
| E34A | Environment | S83I | None | S80I | None | P161R, G164A, F172S, R173G, L195V, F197I, K201M |
| E35 | Environment | None | None | None | None | P161R, G164A, F172S, R173G, L195V, F197I, K201M |

**Table S5: Serotype and mobile genetic elements of MDR *K. pneumoniae* isolates**

| **ID** | **Serotype** | | **Plasmid** | **Insertion sequences and transposable elements** | **Prophages** |
| --- | --- | --- | --- | --- | --- |
| **O locus** | **K locus** |
| E4 | O1/O2v1 | KL2 | IncFIB, IncFII | MITEPlu5, ISNarch1, ISCARN29, ISSph8 | None |
| E34A | O1/O2v2 | KL102 | IncFIB, IncFII | ISCsr4, ISEch7, ISRor8, ISKpn21 | Salmon_118970_sal3, Entero_mEp237, Klebsi_3LV2017 |
| E35 | O1/02v2 | KL23 | IncFIA, IncFIB, IncFII | MITEEc1, TnXax1, ISButh2, ISAusP1 | Salmon_vB_SosS_Oslo, Pseudo_phiPSA1 |
| P60-1 | O1/O2v2 | KL149 | Col440, IncQ1 | MITEPlu5, ISCARN29, ISSph8, ISAs6 | Entero_HK140 |
| P121 | O1/O2v2 | KL8 | IncFIB, IncHI1B | MITEYpE1, MITEEc1, TsAn2, ISStma11 | None |
| P136 | O1/O2v1 | KL25 | Col440I, Col440II, IncFIB, IncHI1B | ISSty2, IS1230B, IS3F, ISeAl1 | Klebsi_ST512_KPC3phi13.2, Entero_mEp390 |
| P144 | O1/O2v1 | KL47 | Col, IncFIB, IncHI1B | ISRor8, ISKqu3, ISSen13, ISPa40 | Klebsi_ST15_OXA48phi14.1, Salmon_118970_sal3, Salmon_SSU5 |
| E50-2 | O1/O2v1 | KL2 | IncFIB, IncFII | ISkqu3, IS609, TnShfr1, ISArp14 | None |
| P129 | O1/O2v1 | KL53 | Col, IncFIB, IncHI1B | ISEhe4, ISKpn80, ISKpn34, ISRaq1 | None |
| E55-1 | O3b | KL103 | IncFIA, IncFIB, IncFII | ISEc14, ISEam1, ISEc24, ISEc15 | Cronob_ENT47670 |
